# Supplementary material for: Mapping Aspergillus niger Metabolite Biomarkers for In Situ and Early Evaluation of Table Grapes Contamination
Source: MDPI journal article supplement (doi:10.3390/foods10112870), 2021-11-19
Supplement: s1 [file s1]

## *Supplementary Information*

# **Mapping *Aspergillus niger* Metabolite Biomarkers for In Situ and Early Evaluation of Table Grapes Contamination**

**João Raul Belinato <sup>1</sup>, Carina Pedrosa Costa <sup>2</sup>, Adelaide Almeida <sup>3</sup>, Silvia M. Rocha <sup>2,\*</sup> and Fabio Augusto <sup>1,\*</sup>**

<sup>1</sup> Institute of Chemistry, University of Campinas and National Institute of Science and Technology in Bioanalysis (INCTBio), Brazil.

<sup>2</sup> Department of Chemistry & LAQV-REQUIMTE, University of Aveiro, 3810-193 Aveiro, Portugal.

<sup>3</sup> Department of Biology & CESAM, University of Aveiro, 3810-193 Aveiro, Portugal.

\* Correspondence: [smrocha@ua.pt](mailto:smrocha@ua.pt) and [faugusto@unicamp.br](mailto:faugusto@unicamp.br)

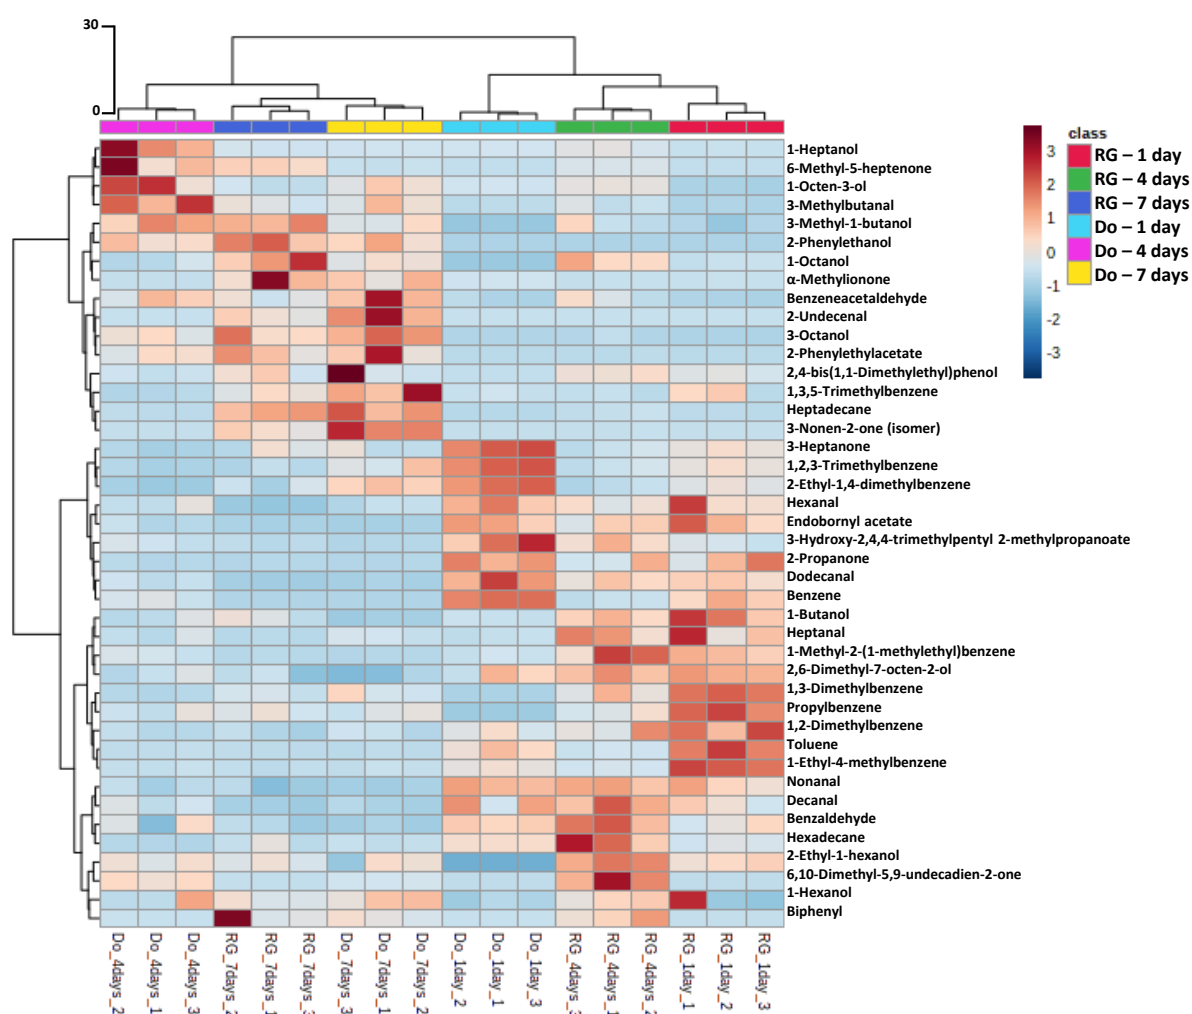

**Figure S1.** Dendrogram and heatmap representation of the 42 metabolites putatively identified from red (RG) and white (Do) tables grapes contaminated with *A. niger*, determined by in-situ HS-SPME/GC×GC-ToFMS, over 7 days, which illustrates the formation of two main clusters related to the two grape varieties, within each one there is an organization of the samples as a function of the growth time.
